# Supplementary material
Source: PubMed Central journal article supplement (PMC6777074)
Supplement: ao9b02414_si_001.pdf [file ao9b02414_si_001.pdf]

## Supporting Information

### In-solution molecular recognition comparison of aptamers against the herbicide atrazine

Mina Roueinfar,<sup>†,§</sup> Kevin M. Abraham,<sup>†,‡</sup> and Ka Lok Hong<sup>†,\*</sup>

<sup>†</sup> Department of Pharmaceutical Sciences, Nesbitt School of Pharmacy, Wilkes University, 84 W. South Street, Wilkes-Barre, PA 18766, USA

<sup>‡</sup> Department of Biology, College of Science and Engineering, Wilkes University, 84 W. South Street, Wilkes-Barre, PA 18766, USA

<sup>§</sup> Department of Physics, College of Science and Engineering, Wilkes University, 84 W. South Street, Wilkes-Barre, PA 18766, USA

#### \* Publication Corresponding Author Contact Information:

Ka Lok Hong

Department of Pharmaceutical Sciences,

Nesbitt School of Pharmacy, Wilkes University,

84 W. South Street, Wilkes-Barre, PA 18766, USA

Email: [kalok.hong@wilkes.edu](mailto:kalok.hong@wilkes.edu)

Phone: +1-570-408-4296

Fax: +1-570-408-4299

Table S1. Binding thermodynamic values of ITC experiment

|                      | <b>Aptamer: atrazine molar Ratio = 1:10</b>   |
|----------------------|-----------------------------------------------|
| n-value              | $2.62 \times 10^{-1} \pm 3.63 \times 10^{-1}$ |
| K (M <sup>-1</sup> ) | $3.87 \times 10^5 \pm 6.06 \times 10^5$       |
| K <sub>d</sub> (μM)  | $2.58 \pm 1.65$                               |
| ΔH (kcal/ mol)       | $-692.9 \pm 1121$                             |
| ΔS (cal/ mol/ deg)   | 23.2                                          |
| c value              | 1.02                                          |

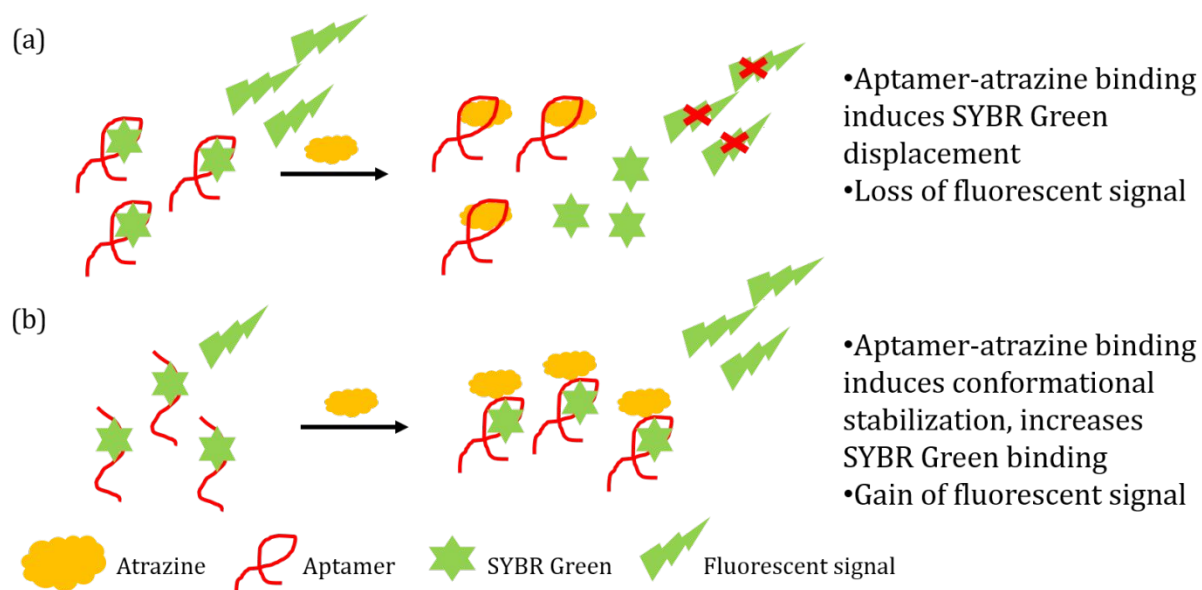

Figure S1. (a) Principle of SYBR Green assays for loss of fluorescent signal demonstrated in R12.23 Trunc. (b) Principle of SYBR green assays for the gain of fluorescent signal previously demonstrated in R12.45 Trunc.

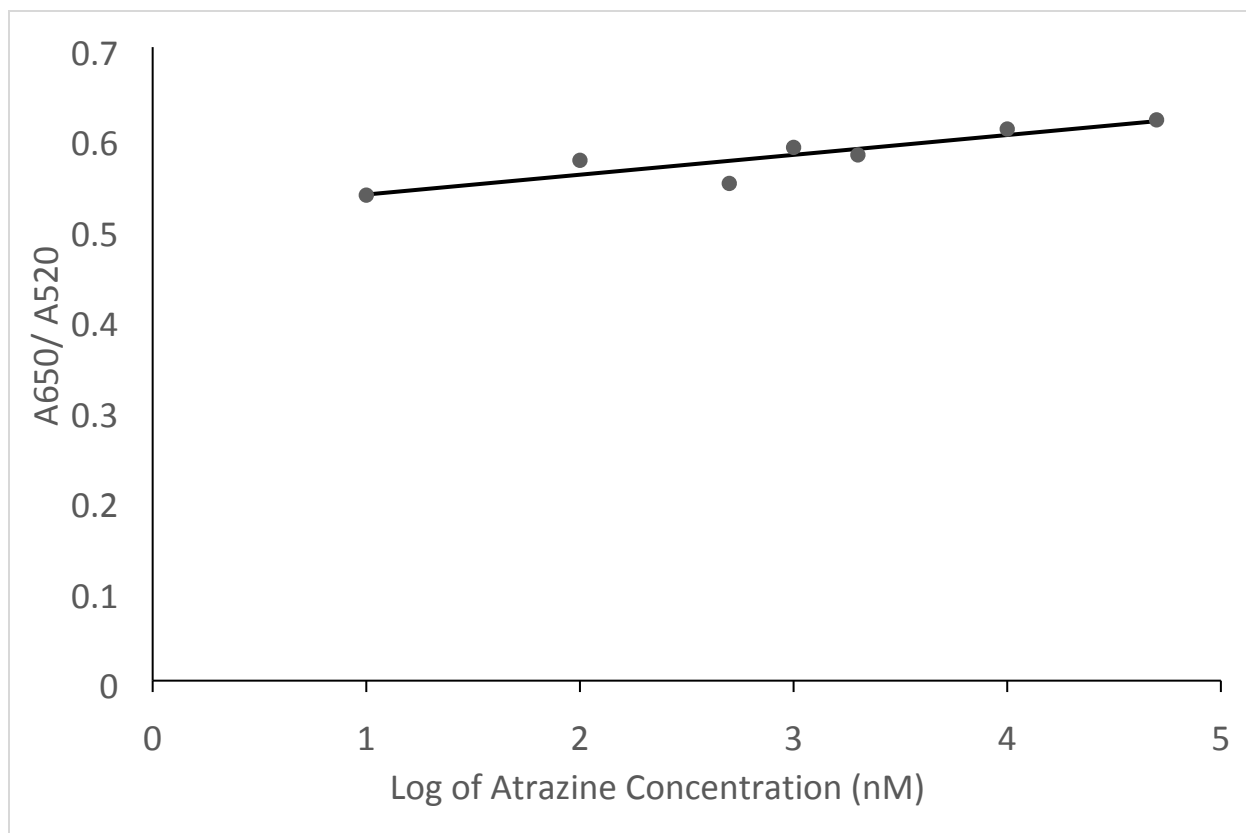

Figure S2. Linear calibration curves for the R12.23 Trunc. adsorbed AuNP aggregation assay. Linear responses was obtained between 10 nM and 50  $\mu$ M; LOD (3.3 sigma / slope) = 174 nM.

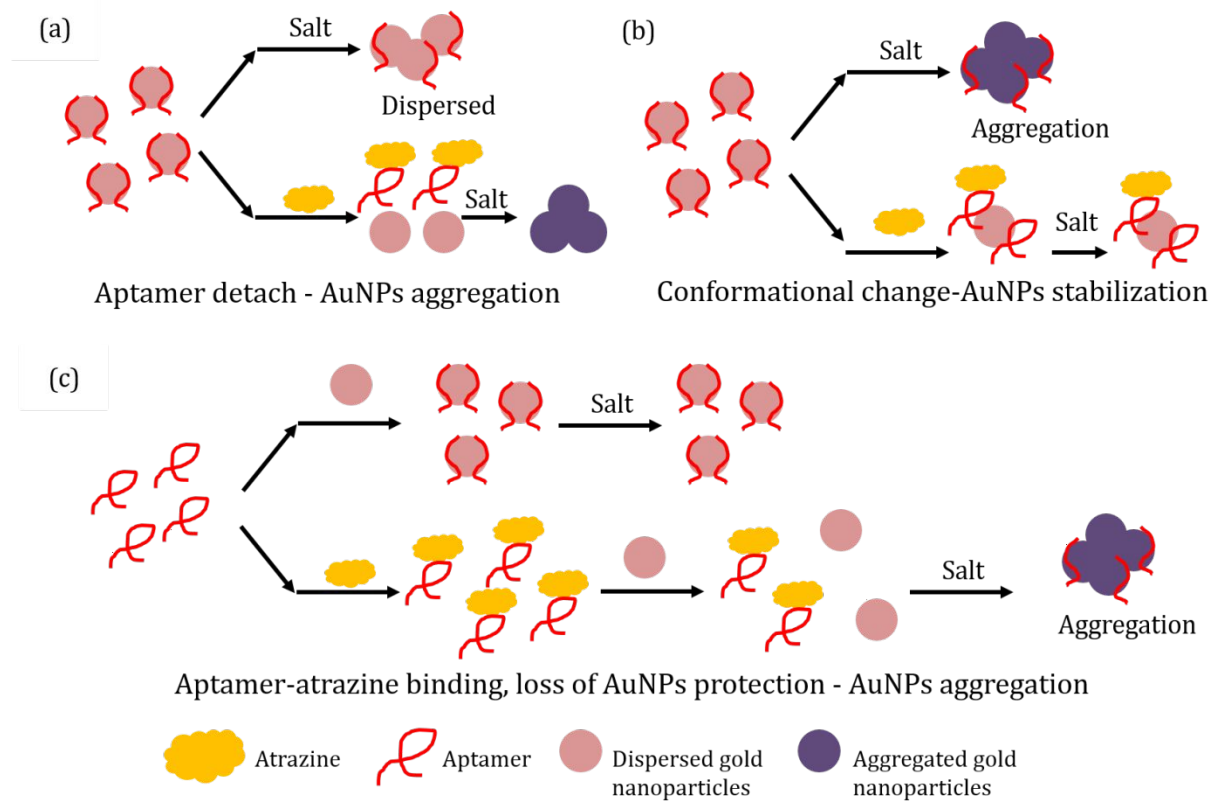

Figure S3. (a) Principle of the adsorbed AuNP aggregation assays using R12.23 Trunc. (b) Principle of the adsorbed AuNP aggregation assays using R12.45 Trunc. (c) Principle of the free AuNP aggregation assays using either R12.23 Trunc. and R12.45 Trunc.

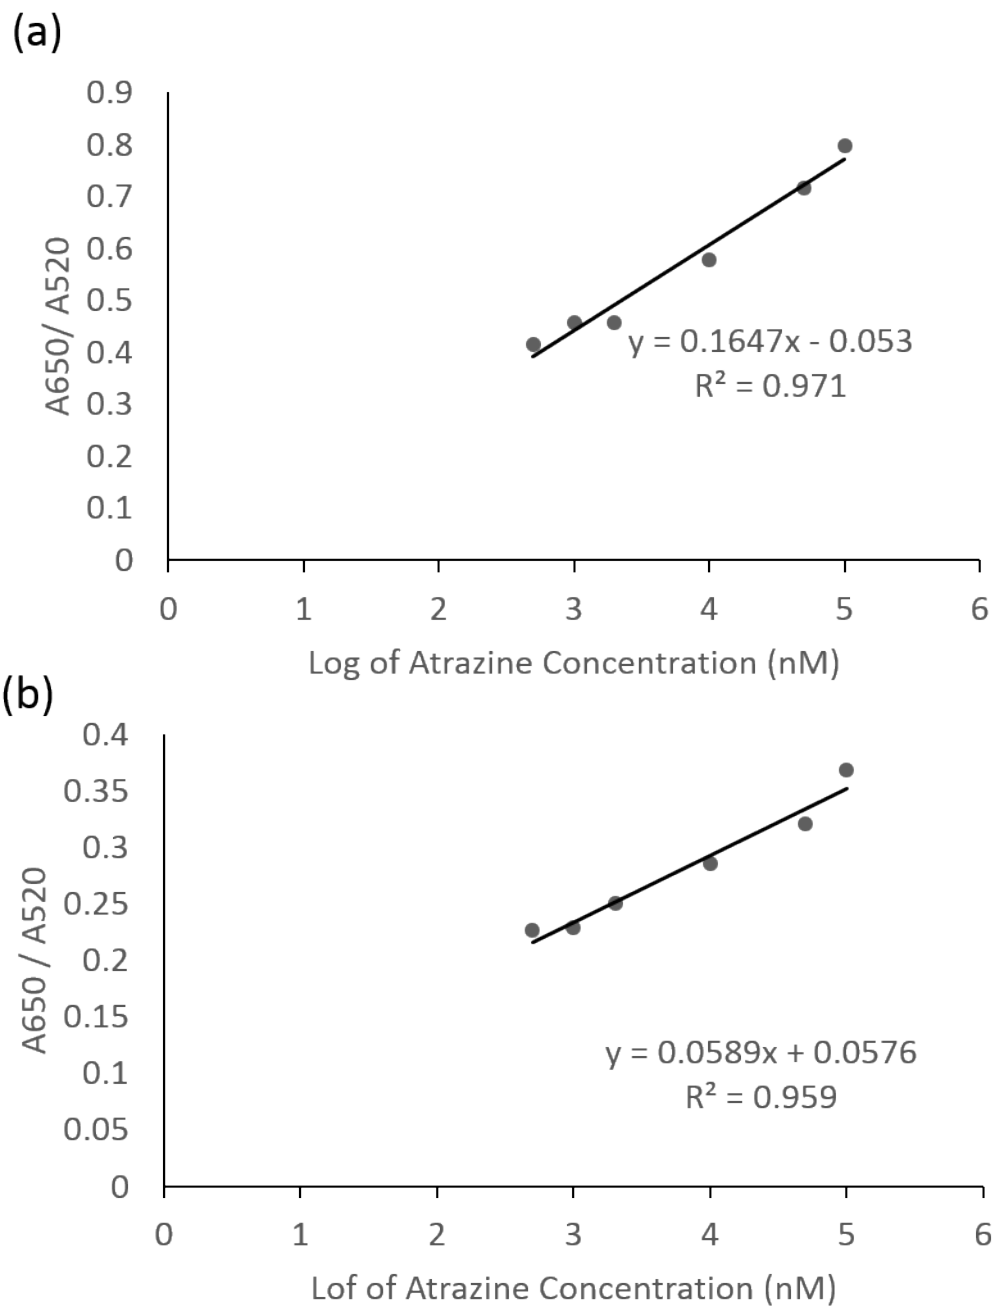

Figure S4. (a) Linear calibration curves for the R12.23 Trunc. free AuNP aggregation assay. Linear responses were obtained between 500 nM and 100  $\mu$ M; LOD (3.3 sigma / slope) = 4 nM (b) Linear calibration curves for the R12.45 Trunc. free AuNP aggregation assay. Linear responses were obtained between 500 nM and 100  $\mu$ M; LOD (3.3 sigma / slope) = 5 nM.
